# Supplementary material for: Microbiome of the Black-Lipped Pearl Oyster Pinctada margaritifera, a Multi-Tissue Description With Functional Profiling
Source: Front Microbiol. 2019 Jul 5;10:1548. doi: 10.3389/fmicb.2019.01548 (PMC6624473; doi:10.3389/fmicb.2019.01548)
Supplement: DATA S2 — Overview of significant tissue differences in microbiome composition based on relative abundances of bacterial families, individual OTUs and community diversity and richness. [file Table_2.XLSX]

## Sheet: Bacterial families
Supplementary Data 2	Overview of significant tissue differences in microbiome composition based on relative abundances of bacterial families, individual OTUs and community diversity and richness.
PERMANOVA	F.Model	df	p-value	Signif.
Bacterial families	4.6471	7	0.0001	***
PAIRWISE
Pairs	F.Model	R2	p-value	p.adjusted	Signif.
GI vs BG	10.4669	0.322387	0.001	0.028	.
GI vs GD	3.44755	0.135477	0.003	0.084
GI vs HL	5.67877	0.205167	0.001	0.028	.
GI vs AM	8.34756	0.284438	0.001	0.028	.
GI vs MT	5.49453	0.199841	0.001	0.028	.
GI vs MC	14.6947	0.400459	0.001	0.028	.
GI vs GT	13.3723	0.378045	0.001	0.028	.
BG vs GD	5.51252	0.200364	0.001	0.028	.
BG vs HL	4.04208	0.155214	0.001	0.028	.
BG vs AM	2.28631	0.0981825	0.002	0.056
BG vs MT	3.14047	0.124917	0.001	0.028	.
BG vs MC	4.25715	0.162133	0.001	0.028	.
BG vs GT	5.08446	0.187726	0.001	0.028	.
GD vs HL	1.47514	0.0628386	0.06	1
GD vs AM	3.13658	0.129951	0.003	0.084
GD vs MT	2.67726	0.108491	0.005	0.14
GD vs MC	6.44371	0.226543	0.001	0.028	.
GD vs GT	7.50227	0.254295	0.001	0.028	.
HL vs AM	1.68467	0.0742648	0.023	0.644
HL vs MT	2.12888	0.0882296	0.001	0.028	.
HL vs MC	3.92577	0.151424	0.001	0.028	.
HL vs GT	5.38001	0.196494	0.001	0.028	.
AM vs MT	1.23659	0.0556104	0.14	1
AM vs MC	1.36258	0.0609312	0.106	1
AM vs GT	3.98218	0.159401	0.001	0.028	.
MT vs MC	1.9568	0.0816805	0.014	0.392
MT vs GT	4.98862	0.184842	0.001	0.028	.
MC vs GT	8.00787	0.266859	0.001	0.028	.
Signif. codes: 0 '***' 0.001 '**' 0.01 '*' 0.05 '.'

## Sheet: Individual OTUs
Supplementary Data 2	Overview of significant tissue differences in microbiome composition based on relative abundances of bacterial families, individual OTUs and community diversity and richness.
PERMANOVA	F.Model	df	p-value	Signif.
Individual OTUs	3.6285	7	0.0001	***
PAIRWISE
Pairs	F.Model	R2	p-value	p.adjusted	Signif.
GI vs BG	7.65159	0.25805	0.001	0.028	.
GI vs GD	3.33523	0.131644	0.001	0.028	.
GI vs HL	4.07273	0.156206	0.001	0.028	.
GI vs AM	4.69458	0.182707	0.001	0.028	.
GI vs MT	3.75519	0.145803	0.001	0.028	.
GI vs MC	6.83432	0.23702	0.001	0.028	.
GI vs GT	9.99681	0.312431	0.001	0.028	.
BG vs GD	4.51874	0.170398	0.001	0.028	.
BG vs HL	3.24983	0.128707	0.001	0.028	.
BG vs AM	1.97048	0.085783	0.001	0.028	.
BG vs MT	3.19931	0.12696	0.001	0.028	.
BG vs MC	3.87013	0.149598	0.001	0.028	.
BG vs GT	4.42331	0.167402	0.001	0.028	.
GD vs HL	1.31553	0.056423	0.024	0.672
GD vs AM	2.20839	0.0951548	0.002	0.056
GD vs MT	2.19557	0.0907425	0.001	0.028	.
GD vs MC	4.40085	0.166693	0.001	0.028	.
GD vs GT	5.99001	0.214005	0.001	0.028	.
HL vs AM	1.28239	0.0575516	0.067	1
HL vs MT	1.83919	0.0771498	0.001	0.028	.
HL vs MC	3.06842	0.122402	0.001	0.028	.
HL vs GT	4.16139	0.159066	0.001	0.028	.
AM vs MT	1.27413	0.0572023	0.038	1
AM vs MC	1.60773	0.0711144	0.02	0.56
AM vs GT	3.20889	0.13255	0.001	0.028	.
MT vs MC	1.54887	0.0657724	0.006	0.168
MT vs GT	5.09448	0.188027	0.001	0.028	.
MC vs GT	6.63204	0.23163	0.001	0.028	.
Signif. codes: 0 '***' 0.001 '**' 0.01 '*' 0.05 '.'

## Sheet: Shannon
Supplementary Data 2	Overview of significant tissue differences in microbiome composition based on relative abundances of bacterial families, individual OTUs and community diversity and richness.
ANOVA	F.Model	df	p-value	Signif.
Shannon	9.335	7	1.4e-08	***
TUCKEY
Pairs	p.adjusted	Signif.
GI vs BG	6.3e-05	***
GI vs GD	0.494806
GI vs HL	0.01232	**
GI vs AM	1.47e-05	***
GI vs MT	0.0054738	**
GI vs MC	0	***
GI vs GT	0.0005651	***
BG vs GD	0.0557975
BG vs HL	0.822926
BG vs AM	0.999765
BG vs MT	0.925794
BG vs MC	0.525422
BG vs GT	0.999154
GD vs HL	0.749934
GD vs AM	0.0179485	.
GD vs MT	0.587527
GD vs MC	7.56e-05	***
GD vs GT	0.210898
HL vs AM	0.553465
HL vs MT	0.999996
HL vs MC	0.0211714	.
HL vs GT	0.98552
AM vs MT	0.715792
AM vs MC	0.839342
AM vs GT	0.969596
MT vs MC	0.0435162	.
MT vs GT	0.998084
MC vs GT	0.204375
Signif. codes: 0 '***' 0.001 '**' 0.01 '*' 0.05 '.'

## Sheet: Chao
Supplementary Data 2	Overview of significant tissue differences in microbiome composition based on relative abundances of bacterial families, individual OTUs and community diversity and richness.
KRUSKAL-WALLIS	Chi2	df	p-value	Signif.
Shannon	48.46	7	2.894e-08	***
WILCOXON
Pairs	p.adjusted	Signif.
GI vs BG	0.0059	*
GI vs GD	0.14074
GI vs HL	0.18221
GI vs AM	0.29755
GI vs MT	0.29755
GI vs MC	3.6e-05	***
GI vs GT	0.003	*
BG vs GD	0.00198	*
BG vs HL	0.00173	*
BG vs AM	0.04414	.
BG vs MT	0.10634
BG vs MC	0.21692
BG vs GT	0.44101
GD vs HL	0.6955
GD vs AM	0.03508	.
GD vs MT	0.03586	.
GD vs MC	2.1e-05	***
GD vs GT	0.00012	***
HL vs AM	0.03121	.
HL vs MT	0.02605	.
HL vs MC	2.1e-05	***
HL vs GT	3.6e-05	***
AM vs MT	0.97593
AM vs MC	0.00403	*
AM vs GT	0.11676
MT vs MC	0.00512	*
MT vs GT	0.18221
MC vs GT	0.01053	.
Signif. codes: 0 '***' 0.001 '**' 0.01 '*' 0.05 '.'
