# Supplementary material for: Microbiome of the Black-Lipped Pearl Oyster Pinctada margaritifera, a Multi-Tissue Description With Functional Profiling
Source: Front Microbiol. 2019 Jul 5;10:1548. doi: 10.3389/fmicb.2019.01548 (PMC6624473; doi:10.3389/fmicb.2019.01548)
Supplement: DATA S3 — Similarity percentage (SIMPER) analysis of bacterial community composition associated with different tissues of P. margaritifera. [file Table_3.XLSX]

## Sheet: SIMPER
Supplementary Data 3	Similarity Percentage (SIMPER) analysis of bacterial community composition associated with different tissues of P. margaritifera.
Only significant variations of tissues combinations at the bacterial family level based on PERMANOVA tests and post-hoc tests are shown.
Combination: GI and GD
Lowest taxonomic level from greengenes classification	av.GI	av.GD	p-value	Signif.
k__Bacteria_unclassified	52.571021	8.990820	0.001	***
f__Endozoicimonaceae	27.642352	43.307282	0.025	*
f__Erythrobacteraceae	3.737129	7.945664	0.002	**
f__Moraxellaceae	0.003101	0.843568	0.028	*
f__Streptococcaceae	0.000000	0.493115	0.016	*
f__Bacillaceae	0.000000	0.452797	0.011	*
f__Brevibacteriaceae	0.000000	0.096142	0.041	*
f__Chthoniobacteraceae	0.000000	0.012405	0.048	*
Combination: GI and BG
Lowest taxonomic level from greengenes classification	av.GI	av.BG	p-value	Signif.
k__Bacteria_unclassified	52.571021	3.203697	0.001	***
o__Rhizobiales_unclassified	0.114750	18.316586	0.001	***
f__Flavobacteriaceae	1.690237	9.840590	0.009	**
f__Phyllobacteriaceae	0.018608	5.932887	0.001	***
f__Verrucomicrobiaceae	1.119588	2.481082	0.002	**
c__SJA.28_unclassified	0.089939	1.929041	0.009	**
f__Hyphomicrobiaceae	0.043419	1.925940	0.001	***
c__OPB56_unclassified	0.027912	1.711946	0.005	**
f__Sphingomonadaceae	0.071331	1.342885	0.001	***
o__Bdellovibrionales_unclassified	0.127155	0.341149	0.034	*
o__MLE1.12_unclassified	0.009304	0.350453	0.001	***
c__vadinHA49_unclassified	0.012405	0.248108	0.005	**
f__Chitinophagaceae	0.006203	0.133358	0.001	***
f__A4b	0.009304	0.062027	0.038	*
f__Microthrixaceae	0.000000	0.034115	0.003	**
c__Opitutae_unclassified	0.000000	0.021709	0.032	*
c__VC2_1_Bac22_unclassified	0.000000	0.006203	0.038	*
Combination: GI and HL
Lowest taxonomic level from greengenes classification	av.GI	av.HL	p-value	Signif.
k__Bacteria_unclassified	52.571021	12.616301	0.001	***
p__Proteobacteria_unclassified	0.803250	5.390150	0.006	**
f__Staphylococcaceae	0.003101	2.896663	0.048	*
f__Intrasporangiaceae	0.000000	0.728818	0.001	***
o__Chroococcales_unclassified	0.000000	0.418683	0.004	**
f__Bifidobacteriaceae	0.003101	0.378365	0.048	*
f__Dermabacteraceae	0.000000	0.201588	0.021	*
f__Thermaceae	0.000000	0.170574	0.041	*
f__Coriobacteriaceae	0.000000	0.148865	0.001	***
f__Prevotellaceae	0.000000	0.136459	0.024	*
f__Xanthomonadaceae	0.000000	0.093041	0.025	*
f__Actinomycetaceae	0.000000	0.058926	0.040	*
f__Burkholderiaceae	0.000000	0.027912	0.027	*
Combination: GI and MT
Lowest taxonomic level from greengenes classification	av.GI	av.MT	p-value	Signif.
k__Bacteria_unclassified	52.571021	5.476988	0.001	***
f__Rhodobacteraceae	1.011041	7.344002	0.001	***
o__Rhodospirillales_unclassified	0.040318	0.604764	0.020	*
f__OM60	0.089939	0.545838	0.037	*
f__HTCC2089	0.015507	0.310135	0.046	*
f__Ellin6075	0.009304	0.198487	0.030	*
o__BPC015_unclassified	0.012405	0.083737	0.039	*
c__Oscillatoriophycideae_unclassified	0.000000	0.058926	0.017	*
o__Rickettsiales_unclassified	0.003101	0.015507	0.033	*
Combination: GI and AM
Lowest taxonomic level from greengenes classification	av.GI	av.AM	p-value	Signif.
k__Bacteria_unclassified	52.571021	6.841019	0.001	***
f__Flammeovirgaceae	0.068230	2.314173	0.028	*
o__agg27_unclassified	0.024811	0.544710	0.001	***
f__OM27	0.027912	0.294347	0.031	*
p__Chloroflexi_unclassified	0.009304	0.236831	0.013	*
f__Syntrophobacteraceae	0.000000	0.182698	0.043	*
o__CCU21_unclassified	0.000000	0.115032	0.045	*
f__Kordiimonadaceae	0.006203	0.057516	0.027	*
f__Spirochaetaceae	0.000000	0.043983	0.036	*
c__OP8_2_unclassified	0.018608	0.013533	0.039	*
Combination: GI and MC
Lowest taxonomic level from greengenes classification	av.GI	av.MC	p-value	Signif.
k__Bacteria_unclassified	52.571021	10.110408	0.001	***
f__Flavobacteriaceae	1.690237	13.363727	0.001	***
o__Oceanospirillales_unclassified	1.066865	9.155192	0.041	*
f__Rhodobacteraceae	1.011041	6.457015	0.038	*
f__Alteromonadaceae	0.139561	1.910433	0.002	**
f__Oceanospirillaceae	0.155068	1.172311	0.006	**
o__Alteromonadaceae_unclassified	0.124054	1.100980	0.002	**
f__Oleiphilaceae	0.058926	0.831162	0.002	**
o__Rhodospirillales_unclassified	0.040318	0.607865	0.034	*
f__Hyphomonadaceae	0.040318	0.508622	0.021	*
f__Saccharospirillaceae	0.024811	0.319439	0.008	**
o__CL500.15_unclassified	0.034115	0.269818	0.001	***
f__Haliangiaceae	0.000000	0.155068	0.038	*
f__ntu14	0.006203	0.124054	0.031	*
c__Nostocophycideae_unclassified	0.000000	0.102345	0.009	**
o__MVS.107_unclassified	0.000000	0.052723	0.046	*
f__Trueperaceae	0.000000	0.027912	0.009	**
o__Pedosphaerales_unclassified	0.000000	0.015507	0.004	**
f__Puniceicoccaceae	0.003101	0.012405	0.027	*
Combination: GI and GT
Lowest taxonomic level from greengenes classification	av.GI	av.GT	p-value	Signif.
k__Bacteria_unclassified	52.571021	6.996651	0.001	***
f__Peptostreptococcaceae	0.015507	31.978042	0.001	***
f__Pirellulaceae	0.409378	7.992185	0.001	***
c__Mollicutes_unclassified	0.000000	1.947649	0.001	***
f__Bacteriovoracaceae	0.015507	0.427987	0.011	*
p__Firmicutes_unclassified	0.018608	0.338047	0.001	***
f__Synechococcaceae	0.012405	0.189182	0.002	**
f__Mycobacteriaceae	0.000000	0.142662	0.001	***
c__Ellin6529_unclassified	0.012405	0.130257	0.013	*
f__Desulfobulbaceae	0.009304	0.077534	0.001	***
f__Parachlamydiaceae	0.000000	0.068230	0.001	***
f__Clostridiaceae	0.003101	0.058926	0.005	**
f__Mycoplasmataceae	0.000000	0.034115	0.049	*
c__SJA.4_unclassified	0.000000	0.018608	0.026	*
f__Legionellaceae	0.000000	0.009304	0.038	*
o__YS2_unclassified	0.000000	0.009304	0.025	*
o__B110_unclassified	0.000000	0.006203	0.027	*
p__TM6_unclassified	0.000000	0.006203	0.041	*
Combination: GD and BG
Lowest taxonomic level from greengenes classification	av.GD	av.BG	p-value	Signif.
f__Endozoicimonaceae	43.307282	4.366704	0.001	***
o__Rhizobiales_unclassified	0.623372	18.316586	0.001	***
f__Erythrobacteraceae	7.945664	3.501427	0.001	***
f__Phyllobacteriaceae	0.415581	5.932887	0.001	***
f__Phycisphaeraceae	1.345987	1.383203	0.002	**
c__SJA.28_unclassified	0.502419	1.929041	0.003	**
f__Hyphomicrobiaceae	0.387669	1.925940	0.001	***
c__OPB56_unclassified	0.040318	1.711946	0.015	*
f__Sphingomonadaceae	0.077534	1.342885	0.001	***
f__Moraxellaceae	0.843568	0.021709	0.026	*
o__Acidimicrobiales_unclassified	0.201588	0.493115	0.026	*
f__Streptococcaceae	0.493115	0.015507	0.013	*
f__Bacillaceae	0.452797	0.000000	0.011	*
o__MLE1.12_unclassified	0.015507	0.350453	0.001	***
o__GCA004_unclassified	0.142662	0.139561	0.045	*
c__vadinHA49_unclassified	0.021709	0.248108	0.007	**
f__Chitinophagaceae	0.009304	0.133358	0.001	***
p__Verrucomicrobia_unclassified	0.034115	0.093041	0.016	*
f__Brevibacteriaceae	0.096142	0.000000	0.045	*
o__iii1.15_unclassified	0.068230	0.021709	0.035	*
f__Isosphaeraceae	0.027912	0.055824	0.029	*
f__A4b	0.012405	0.062027	0.019	*
f__Pasteurellaceae	0.034115	0.012405	0.011	*
f__Microthrixaceae	0.006203	0.034115	0.001	***
c__Opitutae_unclassified	0.000000	0.021709	0.027	*
c__VC2_1_Bac22_unclassified	0.000000	0.006203	0.031	*
Combination: GD and MC
Lowest taxonomic level from greengenes classification	av.GD	av.MC	p-value	Signif.
f__Endozoicimonaceae	43.307282	3.653393	0.001	***
f__Flavobacteriaceae	2.822230	13.363727	0.001	***
f__Erythrobacteraceae	7.945664	2.003474	0.003	**
f__Alteromonadaceae	0.434189	1.910433	0.018	*
f__Oceanospirillaceae	0.235703	1.172311	0.010	**
o__Alteromonadaceae_unclassified	0.347351	1.100980	0.007	**
f__Moraxellaceae	0.843568	0.049622	0.034	*
f__Oleiphilaceae	0.229500	0.831162	0.006	**
o__Rhodospirillales_unclassified	0.074432	0.607865	0.035	*
f__Streptococcaceae	0.493115	0.027912	0.008	**
f__Hyphomonadaceae	0.027912	0.508622	0.012	*
f__Bacillaceae	0.452797	0.040318	0.002	**
f__Saccharospirillaceae	0.111649	0.319439	0.007	**
o__Clostridiales_unclassified	0.099243	0.223297	0.009	**
o__CL500.15_unclassified	0.077534	0.269818	0.021	*
o__Phycisphaerales_unclassified	0.058926	0.179878	0.020	*
f__Haliangiaceae	0.000000	0.155068	0.045	*
f__ntu14	0.003101	0.124054	0.021	*
f__HTCC2188	0.037216	0.099243	0.024	*
c__Nostocophycideae_unclassified	0.021709	0.102345	0.002	**
f__Brevibacteriaceae	0.096142	0.003101	0.044	*
o__MVS.107_unclassified	0.006203	0.052723	0.029	*
f__Trueperaceae	0.003101	0.027912	0.005	**
f__Amoebophilaceae	0.015507	0.015507	0.049	*
o__Pedosphaerales_unclassified	0.000000	0.015507	0.003	**
Combination: GD and GT
Lowest taxonomic level from greengenes classification	av.GD	av.GT	p-value	Signif.
f__Endozoicimonaceae	43.307282	3.653393	0.001	***
f__Peptostreptococcaceae	0.043419	31.978042	0.001	***
f__Erythrobacteraceae	7.945664	1.423521	0.003	**
f__Pirellulaceae	1.516561	7.992185	0.001	***
c__Mollicutes_unclassified	0.009304	1.947649	0.001	***
f__Moraxellaceae	0.843568	0.012405	0.030	*
f__Streptococcaceae	0.493115	0.024811	0.011	*
f__Bacillaceae	0.452797	0.018608	0.012	*
f__Bacteriovoracaceae	0.046520	0.427987	0.021	*
p__Firmicutes_unclassified	0.012405	0.338047	0.001	***
f__Synechococcaceae	0.003101	0.189182	0.001	***
f__Mycobacteriaceae	0.037216	0.142662	0.001	***
c__Ellin6529_unclassified	0.040318	0.130257	0.004	**
f__Brevibacteriaceae	0.096142	0.003101	0.047	*
f__Desulfobulbaceae	0.006203	0.077534	0.001	***
f__Parachlamydiaceae	0.000000	0.068230	0.001	***
f__Clostridiaceae	0.000000	0.058926	0.005	**
c__SJA.4_unclassified	0.006203	0.018608	0.002	**
f__Micrococcaceae.70.	0.015507	0.006203	0.046	*
o__0319.7L14_unclassified	0.012405	0.003101	0.014	*
f__Legionellaceae	0.000000	0.009304	0.032	*
o__YS2_unclassified	0.000000	0.009304	0.031	*
o__B110_unclassified	0.000000	0.006203	0.028	*
p__TM6_unclassified	0.000000	0.006203	0.040	*
Combination: BG and HL
Lowest taxonomic level from greengenes classification	av.BG	av.HL	p-value	Signif.
o__Rhizobiales_unclassified	18.316586	4.835008	0.001	***
o__Flavobacteriales_unclassified	5.154447	5.365339	0.001	***
f__Phyllobacteriaceae	5.932887	0.691602	0.001	***
p__Proteobacteria_unclassified	0.241905	5.390150	0.013	*
f__Rhizobiaceae	0.688500	2.239176	0.001	***
c__SJA.28_unclassified	1.929041	0.071331	0.013	*
f__Hyphomicrobiaceae	1.925940	0.372162	0.001	***
c__OPB56_unclassified	1.711946	0.089939	0.009	**
f__Sphingomonadaceae	1.342885	0.176777	0.001	***
f__Intrasporangiaceae	0.009304	0.728818	0.001	***
o__Chroococcales_unclassified	0.006203	0.418683	0.005	**
o__MLE1.12_unclassified	0.350453	0.015507	0.001	***
c__vadinHA49_unclassified	0.248108	0.000000	0.004	**
f__Dermabacteraceae	0.000000	0.201588	0.015	*
f__Thermaceae	0.006203	0.170574	0.019	*
f__Coriobacteriaceae	0.006203	0.148865	0.001	***
f__Prevotellaceae	0.000000	0.136459	0.024	*
f__Chitinophagaceae	0.133358	0.015507	0.001	***
f__Xanthomonadaceae	0.027912	0.093041	0.003	**
f__A4b	0.062027	0.000000	0.035	*
f__Microthrixaceae	0.034115	0.000000	0.002	**
f__Burkholderiaceae	0.006203	0.027912	0.012	*
c__Opitutae_unclassified	0.021709	0.003101	0.015	*
c__VC2_1_Bac22_unclassified	0.006203	0.000000	0.042	*
Combination: BG and MT
Lowest taxonomic level from greengenes classification	av.BG	av.MT	p-value	Signif.
o__Rhizobiales_unclassified	18.316586	0.694703	0.001	***
f__Phyllobacteriaceae	5.932887	0.192284	0.001	***
f__Rhodobacteraceae	3.461109	7.344002	0.050	*
c__SJA.28_unclassified	1.929041	0.105446	0.005	**
c__OPB56_unclassified	1.711946	0.021709	0.001	***
f__Hyphomicrobiaceae	1.925940	0.378365	0.001	***
f__Sphingomonadaceae	1.342885	0.229500	0.002	**
o__Rhodospirillales_unclassified	0.127155	0.604764	0.030	*
o__MLE1.12_unclassified	0.350453	0.009304	0.001	***
f__HTCC2089	0.024811	0.310135	0.024	*
c__vadinHA49_unclassified	0.248108	0.006203	0.003	**
f__Ellin6075	0.120953	0.198487	0.002	**
o__Chromatiales_unclassified	0.108547	0.155068	0.024	*
f__Chitinophagaceae	0.133358	0.006203	0.001	***
o__BPC015_unclassified	0.018608	0.083737	0.050	*
f__Caldilineaceae	0.046520	0.049622	0.001	***
f__A4b	0.062027	0.000000	0.042	*
c__Oscillatoriophycideae_unclassified	0.006203	0.058926	0.019	*
o__Deinococcales_unclassified	0.012405	0.034115	0.027	*
f__Microthrixaceae	0.034115	0.006203	0.001	***
f__PAUC26f	0.012405	0.021709	0.017	*
f__lheB3.7	0.015507	0.009304	0.011	*
c__Opitutae_unclassified	0.021709	0.000000	0.030	*
c__Phycisphaerae_unclassified	0.009304	0.003101	0.039	*
c__VC2_1_Bac22_unclassified	0.006203	0.000000	0.033	*
Combination: BG and MC
Lowest taxonomic level from greengenes classification	av.BG	av.MC	p-value	Signif.
o__Rhizobiales_unclassified	18.316586	0.641980	0.001	***
f__Phyllobacteriaceae	5.932887	0.663689	0.001	***
c__SJA.28_unclassified	1.929041	0.375264	0.006	**
c__OPB56_unclassified	1.711946	0.105446	0.007	**
f__Alteromonadaceae	0.998635	1.910433	0.014	*
f__Hyphomicrobiaceae	1.925940	0.390770	0.001	***
f__Sphingomonadaceae	1.342885	0.533433	0.004	**
f__Oceanospirillaceae	0.105446	1.172311	0.003	**
o__Alteromonadaceae_unclassified	0.338047	1.100980	0.039	*
f__Hyphomonadaceae	0.062027	0.508622	0.036	*
o__MLE1.12_unclassified	0.350453	0.018608	0.001	***
f__Saccharospirillaceae	0.093041	0.319439	0.024	*
c__vadinHA49_unclassified	0.248108	0.040318	0.008	**
f__Pseudanabaenaceae	0.052723	0.195385	0.014	*
f__Haliangiaceae	0.024811	0.155068	0.025	*
f__ntu14	0.009304	0.124054	0.019	*
p__Verrucomicrobia_unclassified	0.093041	0.034115	0.029	*
c__Nostocophycideae_unclassified	0.027912	0.102345	0.005	**
f__Acaryochloridaceae	0.037216	0.099243	0.029	*
f__ZA3409c	0.049622	0.080635	0.034	*
f__A4b	0.062027	0.031014	0.022	*
o__MVS.107_unclassified	0.003101	0.052723	0.038	*
f__Microthrixaceae	0.034115	0.000000	0.002	**
f__Trueperaceae	0.003101	0.027912	0.005	**
c__Opitutae_unclassified	0.021709	0.000000	0.031	*
c__ML635J.21_unclassified	0.012405	0.012405	0.044	*
o__Rhizobiales_unclassified.88.	0.015507	0.006203	0.032	*
c__SHA.109_unclassified	0.006203	0.015507	0.020	*
o__GMD14H09_unclassified	0.003101	0.015507	0.012	*
o__Pedosphaerales_unclassified	0.000000	0.015507	0.002	**
f__Puniceicoccaceae	0.006203	0.012405	0.017	*
c__VC2_1_Bac22_unclassified	0.006203	0.000000	0.034	*
Combination: BG and GT
Lowest taxonomic level from greengenes classification	av.BG	av.GT	p-value	Signif.
f__Peptostreptococcaceae	0.062027	31.978042	0.001	***
o__Rhizobiales_unclassified	18.316586	2.881156	0.001	***
f__Aeromonadales_unclassified	8.404664	3.346359	0.012	*
f__Flavobacteriaceae	9.840590	2.326014	0.026	*
f__Phyllobacteriaceae	5.932887	0.452797	0.001	***
f__Pirellulaceae	3.358764	7.992185	0.001	***
c__SJA.28_unclassified	1.929041	0.899392	0.005	**
c__Mollicutes_unclassified	0.055824	1.947649	0.001	***
f__Hyphomicrobiaceae	1.925940	0.297730	0.001	***
c__OPB56_unclassified	1.711946	0.362858	0.007	**
f__Sphingomonadaceae	1.342885	0.462101	0.010	**
f__Bacteriovoracaceae	0.031014	0.427987	0.025	*
o__MLE1.12_unclassified	0.350453	0.071331	0.002	**
p__Firmicutes_unclassified	0.034115	0.338047	0.001	***
c__vadinHA49_unclassified	0.248108	0.052723	0.006	**
f__Synechococcaceae	0.006203	0.189182	0.002	**
f__Mycobacteriaceae	0.031014	0.142662	0.001	***
f__Chitinophagaceae	0.133358	0.021709	0.001	***
c__Ellin6529_unclassified	0.058926	0.130257	0.018	*
f__Rhodobiaceae	0.037216	0.052723	0.033	*
f__Desulfobulbaceae	0.012405	0.077534	0.001	***
f__Isosphaeraceae	0.055824	0.024811	0.037	*
f__Parachlamydiaceae	0.003101	0.068230	0.001	***
f__A4b	0.062027	0.024811	0.017	*
f__Clostridiaceae	0.015507	0.058926	0.004	**
f__Microthrixaceae	0.034115	0.003101	0.001	***
f__Mycoplasmataceae	0.000000	0.034115	0.049	*
c__Opitutae_unclassified	0.021709	0.003101	0.020	*
c__SJA.4_unclassified	0.003101	0.018608	0.006	**
f__MND4	0.009304	0.012405	0.013	*
c__AT.s2.57_unclassified	0.009304	0.009304	0.004	**
c__Phycisphaerae_unclassified	0.009304	0.003101	0.041	*
f__Legionellaceae	0.000000	0.009304	0.037	*
o__YS2_unclassified	0.000000	0.009304	0.023	*
c__VC2_1_Bac22_unclassified	0.006203	0.000000	0.033	*
o__B110_unclassified	0.000000	0.006203	0.027	*
p__TM6_unclassified	0.000000	0.006203	0.032	*
Combiation: HL and MT
Lowest taxonomic level from greengenes classification	av.HL	av.MT	p-value	Signif.
f__Corynebacteriaceae	2.902866	7.430840	0.050	*
f__Rhodobacteraceae	4.400819	7.344002	0.003	**
p__Proteobacteria_unclassified	5.390150	0.241905	0.008	**
f__Xenococcaceae	0.096142	3.417690	0.032	*
f__Pseudoalteromonadaceae	2.797420	2.084109	0.039	*
f__Enterobacteriaceae	1.119588	1.228135	0.003	**
f__Vibrionaceae	0.747426	0.555142	0.022	*
f__Marinicellaceae	0.598561	0.412480	0.022	*
f__Intrasporangiaceae	0.728818	0.000000	0.001	***
f__Campylobacteraceae	0.486912	0.251210	0.029	*
o__Rhodospirillales_unclassified	0.052723	0.604764	0.024	*
f__OM60	0.207791	0.545838	0.046	*
o__Chroococcales_unclassified	0.418683	0.027912	0.006	**
f__Bacteriovoracaceae	0.331845	0.089939	0.050	*
f__HTCC2089	0.009304	0.310135	0.047	*
f__Fusobacteriaceae	0.161270	0.145764	0.007	**
f__Dermabacteraceae	0.201588	0.003101	0.019	*
f__Ellin6075	0.009304	0.198487	0.024	*
f__Thermaceae	0.170574	0.000000	0.036	*
f__Coriobacteriaceae	0.148865	0.000000	0.002	**
f__Prevotellaceae	0.136459	0.006203	0.021	*
o__NB1.j_unclassified	0.055824	0.105446	0.011	*
f__Pseudomonadaceae	0.062027	0.049622	0.033	*
f__Xanthomonadaceae	0.093041	0.018608	0.016	*
o__BPC015_unclassified	0.006203	0.083737	0.045	*
f__Actinomycetaceae	0.058926	0.000000	0.041	*
c__Oscillatoriophycideae_unclassified	0.003101	0.058926	0.018	*
f__Burkholderiaceae	0.027912	0.000000	0.037	*
f__OCS155	0.006203	0.003101	0.014	*
Combination: HL and MC
Lowest taxonomic level from greengenes classification	av.HL	av.MC	p-value	Signif.
f__Flavobacteriaceae	4.512467	13.363727	0.001	***
o__Oceanospirillales_unclassified	7.567299	9.155192	0.020	*
p__Proteobacteria_unclassified	5.390150	0.449696	0.011	*
f__Pseudoalteromonadaceae	2.797420	2.750899	0.032	*
f__Cryomorphaceae	1.113385	2.487284	0.023	*
f__Colwelliaceae	2.062399	2.505893	0.003	**
f__Alteromonadaceae	1.079271	1.910433	0.031	*
f__Chroococcaceae	1.426622	0.238804	0.010	**
f__Oceanospirillaceae	0.511723	1.172311	0.001	***
o__Alteromonadaceae_unclassified	0.648183	1.100980	0.001	***
f__Vibrionaceae	0.747426	0.682297	0.025	*
f__Intrasporangiaceae	0.728818	0.043419	0.001	***
f__Oleiphilaceae	0.418683	0.831162	0.013	*
f__Campylobacteraceae	0.486912	0.297730	0.020	*
o__Rhodospirillales_unclassified	0.052723	0.607865	0.026	*
f__Hyphomonadaceae	0.062027	0.508622	0.014	*
c__Pla3_unclassified	0.455899	0.037216	0.012	*
o__Chroococcales_unclassified	0.418683	0.083737	0.001	***
f__Bifidobacteriaceae	0.378365	0.012405	0.041	*
f__Weeksellaceae	0.279122	0.179878	0.049	*
f__Saccharospirillaceae	0.148865	0.319439	0.002	**
o__CL500.15_unclassified	0.027912	0.269818	0.001	***
f__Dermabacteraceae	0.201588	0.003101	0.020	*
f__Pseudanabaenaceae	0.021709	0.195385	0.048	*
f__Haliangiaceae	0.068230	0.155068	0.009	**
f__Thermaceae	0.170574	0.003101	0.028	*
f__Coriobacteriaceae	0.148865	0.000000	0.001	***
f__Prevotellaceae	0.136459	0.012405	0.018	*
f__ntu14	0.000000	0.124054	0.019	*
c__Nostocophycideae_unclassified	0.012405	0.102345	0.011	*
f__Acaryochloridaceae	0.000000	0.099243	0.044	*
f__Xanthomonadaceae	0.093041	0.003101	0.019	*
o__MVS.107_unclassified	0.015507	0.052723	0.011	*
c__Planctomycetia_unclassified	0.040318	0.018608	0.021	*
f__Oxalobacteraceae	0.018608	0.018608	0.047	*
f__Burkholderiaceae	0.027912	0.003101	0.016	*
f__Trueperaceae	0.000000	0.027912	0.009	**
o__Pedosphaerales_unclassified	0.003101	0.015507	0.001	***
f__Puniceicoccaceae	0.003101	0.012405	0.036	*
Combination: HL and GT
Lowest taxonomic level from greengenes classification	av.HL	av.GT	p-value	Signif.
f__Peptostreptococcaceae	0.040318	31.978042	0.001	***
c__Gammaproteobacteria_unclassified	6.283340	8.944300	0.028	*
f__Pirellulaceae	1.711946	7.992185	0.001	***
p__Proteobacteria_unclassified	5.390150	0.548939	0.021	*
c__Mollicutes_unclassified	0.031014	1.947649	0.001	***
f__Intrasporangiaceae	0.728818	0.000000	0.001	***
f__Bacteriovoracaceae	0.331845	0.427987	0.001	***
o__Chroococcales_unclassified	0.418683	0.024811	0.003	**
p__Firmicutes_unclassified	0.083737	0.338047	0.001	***
f__Fusobacteriaceae	0.161270	0.108547	0.039	*
f__Dermabacteraceae	0.201588	0.003101	0.014	*
f__Synechococcaceae	0.052723	0.189182	0.004	**
f__Thermaceae	0.170574	0.000000	0.040	*
f__Coriobacteriaceae	0.148865	0.000000	0.003	**
f__Mycobacteriaceae	0.009304	0.142662	0.002	**
f__Prevotellaceae	0.136459	0.000000	0.020	*
c__Ellin6529_unclassified	0.015507	0.130257	0.013	*
f__Xanthomonadaceae	0.093041	0.000000	0.023	*
f__Desulfobulbaceae	0.000000	0.077534	0.001	***
f__Parachlamydiaceae	0.003101	0.068230	0.002	**
f__Clostridiaceae	0.027912	0.058926	0.001	***
f__Burkholderiaceae	0.027912	0.000000	0.034	*
c__SJA.4_unclassified	0.000000	0.018608	0.023	*
f__Legionellaceae	0.000000	0.009304	0.035	*
o__YS2_unclassified	0.000000	0.009304	0.027	*
p__TM6_unclassified	0.000000	0.006203	0.030	*
Combination: MT and GT
Lowest taxonomic level from greengenes classification	av.MT	av.GT	p-value	Signif.
f__Peptostreptococcaceae	0.021709	31.978042	0.001	***
f__Pirellulaceae	2.664062	7.992185	0.001	***
f__Rhodobacteraceae	7.344002	3.191291	0.038	*
c__Mollicutes_unclassified	0.000000	1.947649	0.001	***
o__Rhodospirillales_unclassified	0.604764	0.043419	0.024	*
f__OM60	0.545838	0.468304	0.008	**
f__Bacteriovoracaceae	0.089939	0.427987	0.030	*
p__Firmicutes_unclassified	0.018608	0.338047	0.001	***
f__HTCC2089	0.310135	0.006203	0.038	*
f__Ellin6075	0.198487	0.012405	0.034	*
f__Synechococcaceae	0.012405	0.189182	0.001	***
f__Mycobacteriaceae	0.003101	0.142662	0.001	***
o__Bacillales_unclassified	0.086838	0.071331	0.002	**
c__Ellin6529_unclassified	0.040318	0.130257	0.005	**
o__Gaiellales_unclassified	0.080635	0.052723	0.003	**
o__BPC015_unclassified	0.083737	0.024811	0.030	*
f__Desulfobulbaceae	0.006203	0.077534	0.001	***
f__Parachlamydiaceae	0.000000	0.068230	0.001	***
c__Oscillatoriophycideae_unclassified	0.058926	0.015507	0.008	**
f__Clostridiaceae	0.009304	0.058926	0.003	**
f__Mycoplasmataceae	0.000000	0.034115	0.040	*
c__SJA.4_unclassified	0.000000	0.018608	0.018	*
f__MND4	0.006203	0.012405	0.031	*
f__Legionellaceae	0.000000	0.009304	0.033	*
o__YS2_unclassified	0.000000	0.009304	0.035	*
f__Entotheonellaceae	0.003101	0.006203	0.022	*
o__B110_unclassified	0.000000	0.006203	0.034	*
p__TM6_unclassified	0.000000	0.006203	0.037	*
Combination: AM and GT
Lowest taxonomic level from greengenes classification	av.AM	av.GT	p-value	Signif.
f__Peptostreptococcaceae	0.027066	31.978042	0.001	***
f__Pirellulaceae	3.088947	7.992185	0.001	***
c__Mollicutes_unclassified	0.013533	1.947649	0.020	*
o__agg27_unclassified	0.544710	0.043419	0.001	***
p__Actinobacteria_unclassified	0.318030	0.189182	0.048	*
f__Bacteriovoracaceae	0.169165	0.427987	0.042	*
f__Cohaesibacteraceae	0.223297	0.164372	0.027	*
f__OM27	0.294347	0.192284	0.011	*
p__Firmicutes_unclassified	0.047366	0.338047	0.001	***
p__Chloroflexi_unclassified	0.236831	0.040318	0.011	*
f__Synechococcaceae	0.040600	0.189182	0.001	***
f__Syntrophobacteraceae	0.182698	0.021709	0.032	*
f__Coxiellaceae	0.118415	0.052723	0.001	***
f__Mycobacteriaceae	0.013533	0.142662	0.001	***
o__CCU21_unclassified	0.115032	0.031014	0.008	**
c__Ellin6529_unclassified	0.071049	0.130257	0.011	*
o__HOC36_unclassified	0.074432	0.083737	0.012	*
f__Desulfobulbaceae	0.006767	0.077534	0.001	***
f__Parachlamydiaceae	0.010150	0.068230	0.003	**
f__Clostridiaceae	0.003383	0.058926	0.002	**
f__Kordiimonadaceae	0.057516	0.003101	0.031	*
f__Gaiellaceae	0.047366	0.018608	0.015	*
f__Spirochaetaceae	0.043983	0.000000	0.042	*
f__Mycoplasmataceae	0.003383	0.034115	0.023	*
f__CV106	0.010150	0.024811	0.048	*
c__SJA.4_unclassified	0.000000	0.018608	0.019	*
o__d113_unclassified	0.013533	0.006203	0.034	*
f__Legionellaceae	0.000000	0.009304	0.042	*
o__YS2_unclassified	0.000000	0.009304	0.040	*
o__B110_unclassified	0.000000	0.006203	0.029	*
p__TM6_unclassified	0.000000	0.006203	0.032	*
Combination: MC and GT
Lowest taxonomic level from greengenes classification	av.MC	av.GT	p-value	Signif.
f__Peptostreptococcaceae	0.018608	31.978042	0.001	***
f__Flavobacteriaceae	13.363727	2.326014	0.001	***
f__Pirellulaceae	2.496589	7.992185	0.001	***
f__Colwelliaceae	2.505893	0.272919	0.041	*
c__Mollicutes_unclassified	0.000000	1.947649	0.001	***
f__Oceanospirillaceae	1.172311	0.043419	0.001	***
o__Alteromonadaceae_unclassified	1.100980	0.170574	0.002	**
o__Rhodospirillales_unclassified	0.607865	0.043419	0.032	*
f__Hyphomonadaceae	0.508622	0.040318	0.027	*
f__Saccharospirillaceae	0.319439	0.021709	0.004	**
p__Firmicutes_unclassified	0.108547	0.338047	0.001	***
o__CL500.15_unclassified	0.269818	0.102345	0.006	**
f__Synechococcaceae	0.040318	0.189182	0.001	***
f__Haliangiaceae	0.155068	0.000000	0.047	*
f__Mycobacteriaceae	0.012405	0.142662	0.001	***
f__ntu14	0.124054	0.034115	0.014	*
c__Nostocophycideae_unclassified	0.102345	0.006203	0.012	*
f__ZA3409c	0.080635	0.040318	0.039	*
f__Desulfobulbaceae	0.024811	0.077534	0.001	***
f__Parachlamydiaceae	0.000000	0.068230	0.001	***
f__Clostridiaceae	0.012405	0.058926	0.006	**
o__MVS.107_unclassified	0.052723	0.006203	0.035	*
f__Mycoplasmataceae	0.003101	0.034115	0.016	*
f__Trueperaceae	0.027912	0.000000	0.010	**
c__SJA.4_unclassified	0.000000	0.018608	0.024	*
o__Pedosphaerales_unclassified	0.015507	0.000000	0.005	**
f__Legionellaceae	0.000000	0.009304	0.031	*
o__YS2_unclassified	0.000000	0.009304	0.031	*
o__B110_unclassified	0.000000	0.006203	0.028	*
p__TM6_unclassified	0.000000	0.006203	0.034	*
Signif. Codes: 0.001 '***' 0.01 '**' 0.05 '*'
